# Supplementary material for: siPRED: Predicting siRNA Efficacy Using Various Characteristic Methods
Source: PubMed Central journal article supplement (PMC3213166; doi:10.1371/journal.pone.0027602), 2011-11-10
Supplement: pone.0027602.s002.pdf [file pone.0027602.s002.pdf]

Table S1. Correlation coefficients among characteristic methods and correlation coefficients between each characteristic method and actual siRNA efficacy.

|                 | Binary | Hybrid | F162  | F85   | F65   | F47   |
|-----------------|--------|--------|-------|-------|-------|-------|
| Binary          | 1      |        |       |       |       |       |
| Hybrid          | 0.997  | 1      |       |       |       |       |
| F162            | 0.858  | 0.847  | 1     |       |       |       |
| F85             | 0.922  | 0.921  | 0.902 | 1     |       |       |
| F65             | 0.920  | 0.919  | 0.887 | 0.989 | 1     |       |
| F47             | 0.926  | 0.925  | 0.876 | 0.980 | 0.990 | 1     |
| Actual efficacy | 0.668  | 0.646  | 0.782 | 0.679 | 0.665 | 0.656 |

The correlation coefficients were computed using dataset A.
