# Supplementary material for: siPRED: Predicting siRNA Efficacy Using Various Characteristic Methods
Source: PubMed Central journal article supplement (PMC3213166; doi:10.1371/journal.pone.0027602), 2011-11-10
Supplement: pone.0027602.s003.pdf [file pone.0027602.s003.pdf]

Table S1. The preference for nucleotides at each position in the sense strand as taken from published reports.

| Position<br>Rules  | 1 |   |   |   | 2 |   |   |   | 3 |   |   |   | 4 |   |   |   | 5 |   |   |   | 6 |   |   |   |
|--------------------|---|---|---|---|---|---|---|---|---|---|---|---|---|---|---|---|---|---|---|---|---|---|---|---|
|                    | A | C | G | U | A | C | G | U | A | C | G | U | A | C | G | U | A | C | G | U | A | C | G | U |
| <b>Reynolds</b>    |   |   |   |   |   |   |   |   | • |   |   |   |   |   |   |   |   |   |   |   |   |   |   |   |
| <b>Ui-Tei</b>      | ▼ | • | • | ▼ |   |   |   |   |   |   |   |   |   |   |   |   |   |   |   |   |   |   |   |   |
| <b>Amarzguioui</b> | ▼ | • | • | ▼ | ▼ |   |   | ▼ | ▼ |   |   | ▼ |   |   |   |   |   |   |   |   | • |   |   |   |
| <b>Hsieh</b>       |   |   |   |   |   |   |   |   |   |   |   |   |   |   |   |   |   |   |   |   |   | ▼ |   |   |
| <b>Takasaki</b>    | ▼ |   | • | ▼ |   |   |   |   |   |   |   |   |   |   |   |   |   |   |   |   | • | ▼ |   |   |
| <b>Svetlana</b>    | ▼ |   | • | ▼ |   |   | • |   |   |   | • | ▼ |   | ▼ |   |   |   |   |   |   | • | ▼ | ▼ | • |
| <b>Jagla 1</b>     |   | • | • |   |   |   |   |   |   |   |   |   |   |   |   |   |   |   |   |   |   |   |   |   |
| <b>Jagla 2</b>     |   | • | • |   |   |   |   |   |   |   |   |   |   |   |   |   |   |   |   |   |   |   |   |   |
| <b>Jagla 3</b>     |   | • | • |   |   |   |   |   |   |   |   |   |   |   |   |   |   |   |   |   |   |   |   |   |
| <b>Jagla 4</b>     | • |   |   | • |   |   |   |   |   |   |   |   |   |   |   |   | • |   |   | • | • |   |   | • |
| <b>Matveeva</b>    | ▼ | • | • | ▼ |   |   |   | ▼ |   | ▼ |   |   |   |   |   | • |   |   |   |   | • | ▼ |   | • |
| <b>Jiang</b>       |   |   | • | ▼ |   |   | • |   |   |   | • | ▼ |   |   |   |   |   |   |   |   | • | ▼ | ▼ | • |

• Preference for high siRNA efficacy. ▼ Preference for low siRNA efficacy.

| Position<br>Rules  | 7 |   |   |   | 8 |   |   |   | 9 |   |   |   | 10 |   |   |   | 11 |   |   |   | 12 |   |   |   |
|--------------------|---|---|---|---|---|---|---|---|---|---|---|---|----|---|---|---|----|---|---|---|----|---|---|---|
|                    | A | C | G | U | A | C | G | U | A | C | G | U | A  | C | G | U | A  | C | G | U | A  | C | G | U |
| <b>Reynolds</b>    |   |   |   |   |   |   |   |   |   |   |   |   |    |   |   | • |    |   |   |   |    |   |   |   |
| <b>Ui-Tei</b>      |   |   |   |   |   |   |   |   |   |   |   |   |    |   |   |   |    |   |   |   |    |   |   |   |
| <b>Amarzguioui</b> |   |   |   |   |   |   |   |   |   |   |   |   |    |   |   |   |    |   |   |   |    |   |   |   |
| <b>Hsieh</b>       |   |   |   |   |   |   |   |   |   |   |   |   |    |   |   |   |    | • | • |   |    |   |   |   |
| <b>Takasaki</b>    |   |   | • | ▼ | • |   | ▼ |   |   |   | ▼ | • |    |   |   |   |    |   |   |   |    |   |   |   |
| <b>Svetlana</b>    | • | ▼ |   |   |   |   |   |   |   |   |   | ▼ |    |   |   | • |    |   |   |   |    |   |   |   |
| <b>Jagla 1</b>     |   |   |   |   |   |   |   |   |   |   |   |   | •  |   |   | • |    |   |   |   |    |   |   |   |
| <b>Jagla 2</b>     |   |   |   |   |   |   |   |   |   |   |   |   |    | • | • |   |    |   |   |   |    |   |   |   |
| <b>Jagla 3</b>     |   |   |   |   |   |   |   |   |   |   |   |   |    |   |   |   |    | • | • |   |    |   |   |   |
| <b>Jagla 4</b>     |   |   |   |   |   |   |   |   |   |   |   |   |    |   |   |   |    |   |   |   |    |   |   |   |
| <b>Matveeva</b>    | • | ▼ |   |   |   |   |   |   |   |   | ▼ |   |    |   |   | • |    |   |   |   | •  |   | ▼ |   |
| <b>Jiang</b>       | • | ▼ |   |   |   |   |   |   |   |   |   | ▼ |    |   |   | • |    |   |   |   |    |   |   |   |

| Position<br>Rules  | 13 |   |   |   | 14 |   |   |   | 15 |   |   |   | 16 |   |   |   | 17 |   |   |   | 18 |   |   |   |
|--------------------|----|---|---|---|----|---|---|---|----|---|---|---|----|---|---|---|----|---|---|---|----|---|---|---|
|                    | A  | C | G | U | A  | C | G | U | A  | C | G | U | A  | C | G | U | A  | C | G | U | A  | C | G | U |
| <b>Reynolds</b>    |    |   | ▼ |   |    |   |   |   |    |   |   |   |    |   |   |   |    |   |   |   |    |   |   |   |
| <b>Ui-Tei</b>      |    |   |   |   |    |   |   |   |    |   |   |   |    |   |   |   |    |   |   |   |    |   |   |   |
| <b>Amarzguioui</b> |    |   |   |   |    |   |   |   |    |   |   |   |    |   |   |   | •  |   |   | • | •  |   |   | • |
| <b>Hsieh</b>       |    |   |   |   |    |   |   |   |    |   |   |   |    |   | • |   |    |   |   |   |    |   |   |   |
| <b>Takasaki</b>    |    |   |   |   |    |   |   |   |    |   |   | • |    |   |   |   |    |   |   |   |    |   |   |   |
| <b>Svetlana</b>    | •  | ▼ | ▼ | • |    | ▼ |   |   | •  |   |   | ▼ |    |   |   |   | •  |   |   |   | •  | ▼ |   |   |
| <b>Jagla 1</b>     |    |   |   |   |    |   |   |   |    |   |   |   |    |   |   |   |    |   |   |   |    |   |   |   |
| <b>Jagla 2</b>     |    |   |   |   |    |   |   |   |    |   |   |   |    |   |   |   |    |   |   |   |    |   |   |   |
| <b>Jagla 3</b>     |    |   |   |   |    |   |   |   |    |   |   |   |    |   |   |   |    |   |   |   |    |   |   |   |
| <b>Jagla 4</b>     |    |   |   |   |    |   |   |   |    |   |   |   |    |   |   |   |    |   |   |   |    |   |   |   |
| <b>Matveeva</b>    | •  |   |   | • |    |   |   |   |    | ▼ |   |   |    |   |   | • | •  |   | ▼ |   | •  | ▼ | ▼ |   |
| <b>Jiang</b>       | •  | ▼ | ▼ | • |    | ▼ |   |   | •  |   |   | ▼ |    |   |   |   | •  |   |   |   | •  | ▼ |   |   |

| Position<br>Rules  | <b>19</b> |   |   |   |
|--------------------|-----------|---|---|---|
|                    | A         | C | G | U |
| <b>Reynolds</b>    |           | ▼ | ▼ |   |
| <b>Ui-Tei</b>      | •         | ▼ | ▼ | • |
| <b>Amarzguioui</b> | •         |   | ▼ | • |
| <b>Hsieh</b>       |           |   | ▼ | • |
| <b>Takasaki</b>    |           |   | ▼ |   |
| <b>Svetlana</b>    | •         |   | ▼ | • |
| <b>Jagla 1</b>     | •         |   |   | • |
| <b>Jagla 2</b>     | •         |   |   | • |
| <b>Jagla 3</b>     |           | • | • |   |
| <b>Jagla 4</b>     | •         |   |   | • |
| <b>Matveeva</b>    | •         | ▼ | ▼ | • |
| <b>Jiang</b>       | •         | ▼ | ▼ | • |
